# Supplementary material for: Antiamoebic Activities of Indolocarbazole Metabolites Isolated from Streptomyces sanyensis Cultures
Source: PubMed Central journal article supplement (PMC6836125; doi:10.3390/md17100588), 2019-10-17

## Supplementary Material

### Antiamoebic activities of indolocarbazole metabolites isolated from *Streptomyces sanyensis* cultures

Luis Cartuche<sup>1,2</sup>, María Reyes-Batlle<sup>3</sup>, Ines Sifaoui<sup>3</sup>, Iñigo Arberas-Jiménez<sup>3</sup>, José E. Piñero<sup>3</sup>, José J. Fernández<sup>1,4</sup>, Jacob Lorenzo-Morales<sup>3\*</sup> and Ana R. Díaz-Marrero<sup>1\*</sup>

<sup>1</sup> Instituto Universitario de Bio-Orgánica Antonio González (IUBO AG), Centro de Investigaciones Biomédicas de Canarias (CIBICAN), Universidad de La Laguna (ULL), Avda. Astrofísico F. Sánchez 2, 38206 La Laguna, Tenerife, Spain; jjfercas@ull.edu.es (J.J.F.)

<sup>2</sup> Departamento de Química y Ciencias Exactas, Sección Química Básica y Aplicada, Universidad Técnica Particular de Loja (UTPL), San Cayetano alto s/n, A.P. 1101608, Loja, Ecuador; lecartuche@utpl.edu.ec (L.C.)

<sup>3</sup> Instituto Universitario de Enfermedades Tropicales y Salud Pública de Islas Canarias, Universidad de La Laguna, Avda. Astrofísico F. Sánchez s/n, 38206 La Laguna, Tenerife, Spain; mreyesba@ull.edu.es (M.R.-B.); isifaoui@ull.edu.es (I.S.); alu0101283227@ull.edu.es (I.A.J.); jpinero@ull.edu.es (J.E.P.)

<sup>4</sup> Departamento de Química Orgánica, Universidad de La Laguna (ULL), Avda. Astrofísico F. Sánchez, 2, 38206 La Laguna, Tenerife, Spain

## Table of Contents

| Contents |                                                                                                                                                         | Page |
|----------|---------------------------------------------------------------------------------------------------------------------------------------------------------|------|
| 1        | <b>Scheme 1.</b> Isolation and purification of metabolites from <i>Streptomyces sanyensis</i>                                                           | S3   |
| 2        | <b>Figure S1.</b> Chemical structure, atom carbon position numbers and physical data for staurosporine (STS) <b>1</b>                                   | S4   |
| 3        | <b>Table S1.</b> NMR data for staurosporine (STS) <b>1</b> in CD <sub>2</sub> Cl <sub>2</sub> (600 MHz, 298 K)                                          | S5   |
| 4        | <b>Figure S2.</b> <sup>1</sup> H NMR spectrum of staurosporine ( <b>1</b> ) in CD <sub>2</sub> Cl <sub>2</sub> (600 MHz, 298 K)                         | S6   |
| 5        | <b>Figure S3.</b> <sup>13</sup> C NMR spectrum of staurosporine ( <b>1</b> ) in CD <sub>2</sub> Cl <sub>2</sub> (150 MHz, 298 K)                        | S7   |
| 6        | <b>Figure S4.</b> Chemical structure, atom carbon position numbers and physical data for 7-oxostaurosporine ( <b>2</b> ).                               | S8   |
| 7        | <b>Table S2.</b> NMR data for 7-oxostaurosporine ( <b>2</b> ) in CD <sub>2</sub> Cl <sub>2</sub> (600 MHz, 298 K)                                       | S9   |
| 8        | <b>Figure S5.</b> <sup>1</sup> H NMR spectrum of 7-oxostaurosporine ( <b>2</b> ) in CD <sub>2</sub> Cl <sub>2</sub> (600 MHz, 298 K)                    | S10  |
| 9        | <b>Figure S6.</b> <sup>13</sup> C NMR spectrum of 7-oxostaurosporine ( <b>2</b> ) in CD <sub>2</sub> Cl <sub>2</sub> (150 MHz, 298 K)                   | S11  |
| 10       | <b>Figure S7.</b> Chemical structure, atom carbon position numbers and physical data for 4'-demethylamino-4'-oxostaurosporine ( <b>3</b> ).             | S12  |
| 11       | <b>Table S3.</b> NMR data for 4'-demethylamino-4'-oxostaurosporine ( <b>3</b> ) in CD <sub>2</sub> Cl <sub>2</sub> (600 MHz, 298 K)                     | S13  |
| 12       | <b>Figure S8.</b> <sup>1</sup> H NMR spectrum of 4'-demethylamino-4'-oxostaurosporine ( <b>3</b> ) in CD <sub>2</sub> Cl <sub>2</sub> (600 MHz, 298 K)  | S14  |
| 13       | <b>Figure S9.</b> <sup>13</sup> C NMR spectrum of 4'-demethylamino-4'-oxostaurosporine ( <b>3</b> ) in CD <sub>2</sub> Cl <sub>2</sub> (150 MHz, 298 K) | S15  |
| 14       | <b>Figure S10.</b> Chemical structure, atom carbon position numbers and physical data for streptocarbazole B (SCZ B, <b>4</b> )                         | S16  |
| 15       | <b>Table S4.</b> NMR data for streptocarbazole B (SCZ B, <b>4</b> ) in CD <sub>2</sub> Cl <sub>2</sub> (600 MHz, 298 K)                                 | S17  |
| 16       | <b>Figure S11.</b> <sup>1</sup> H NMR spectrum of streptocarbazole B (SCZ B, <b>4</b> ) in CD <sub>2</sub> Cl <sub>2</sub> (600 MHz, 298 K)             | S18  |
| 17       | <b>Figure S12.</b> <sup>13</sup> C NMR spectrum of streptocarbazole B (SCZ B, <b>4</b> ) in CD <sub>2</sub> Cl <sub>2</sub> (150 MHz, 298 K)            | S19  |

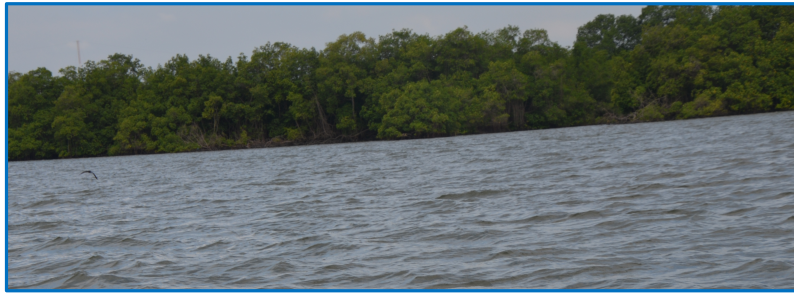

Jambelí Mangrove, Ecuador

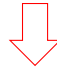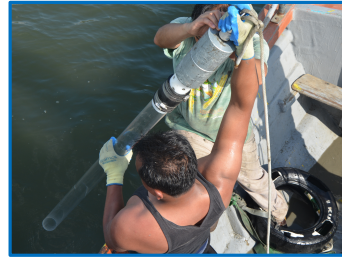

Sediment collection

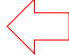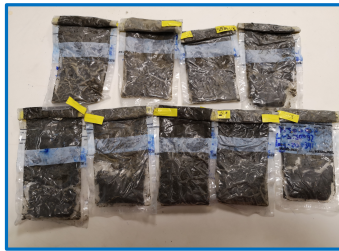

Samples

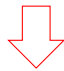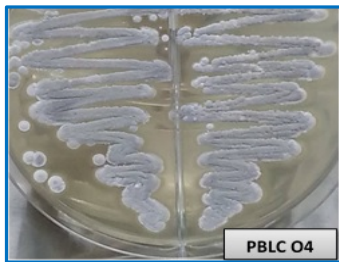

*Streptomyces sanyensis* PBLC04

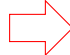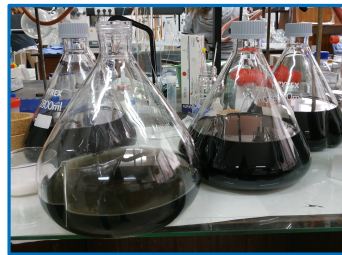

Cultures in Fernbach bottles

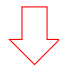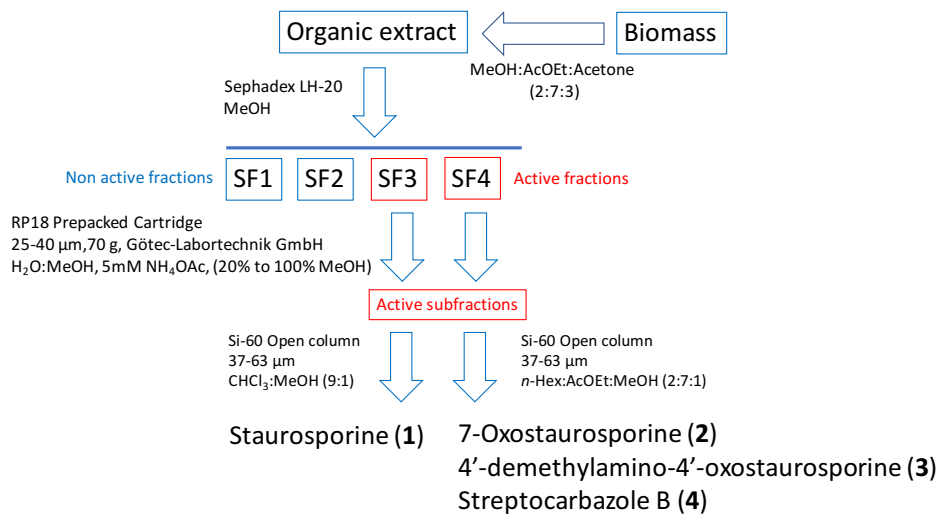

**Scheme 1.** Samples collection, isolation, culture and purification procedure for metabolites from *Streptomyces sanyensis*.

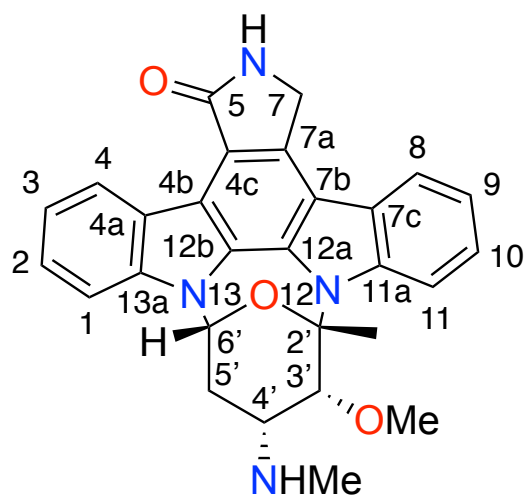

Staurosporine (STS, **1**)

Yellow powder,  $[\alpha]_{\text{D}}^{20} + 43$  (c 0.3,  $\text{CHCl}_3$ )

UV ( $\text{CHCl}_3$ )  $\lambda_{\text{max}}$  (log  $\epsilon$ ) 297 (4.48) nm

IR  $\nu_{\text{max}}$  2920, 2851, 1713, 1568, 1463 and 1318  $\text{cm}^{-1}$

HRESIMS  $m/z$  489.1908  $[\text{M}+\text{Na}]^+$ , calc. 489.1897 for  $\text{C}_{28}\text{H}_{24}\text{N}_4\text{O}_3\text{Na}$

**Figure S1.** Chemical structure, atom carbon position numbers and physical data for staurosporine (STS, **1**).

**Table S1.** NMR data for staurosporine (STS) **1** in CD<sub>2</sub>Cl<sub>2</sub> (600 MHz, 298 K)

| Carbon                       | $\delta^1\text{H}$                      | $\delta^{13}\text{C}$ | HMBC                                            | ROESY                                         |
|------------------------------|-----------------------------------------|-----------------------|-------------------------------------------------|-----------------------------------------------|
| <b>1</b>                     | 7.35, d, $J=8.1$ Hz, 1H)                | 107.8                 | 4a                                              |                                               |
| <b>2</b>                     | 7.49 (t, $J = 7.8$ Hz, 1H)              | 125.5                 | 13a                                             |                                               |
| <b>3</b>                     | 7.34 (t, $J, 7.8$ Hz, 1H)               | 120.0                 | 1                                               |                                               |
| <b>4</b>                     | 9.36 (d, $J = 7.6$ Hz, 1H)              | 126.7                 | 2, 4b, 13a                                      |                                               |
| <b>4a</b>                    | -                                       | 123.8                 |                                                 |                                               |
| <b>4b</b>                    | -                                       | 115.5                 |                                                 |                                               |
| <b>4c</b>                    | -                                       | 118.9                 |                                                 |                                               |
| <b>5</b>                     | -                                       | 174.0                 |                                                 |                                               |
| <b>6</b>                     | 6.73 (s, 1H) NH                         | -                     | 5, 7a, 4c                                       |                                               |
| <b>7</b>                     | 5.00 (dd, $J= 1.7, 1.0$ Hz, 2H)         | 46.5                  | 5, 7a, 7b, 4c,<br>12 <sup>a</sup> ( $J^4$ weak) |                                               |
| <b>7a</b>                    | -                                       | 133.0                 |                                                 |                                               |
| <b>7b</b>                    | -                                       | 114.6                 |                                                 |                                               |
| <b>7c</b>                    | -                                       | 125.0                 |                                                 |                                               |
| <b>8</b>                     | 7.90 (d, $J = 7.8$ Hz, 1H)              | 121.1                 |                                                 | 7                                             |
| <b>9</b>                     | 7.30 (t, $J = 7.5$ Hz, 1H)              | 120.4                 |                                                 |                                               |
| <b>10</b>                    | 7.42 (t, $J = 8.1$ Hz, 1H)              | 124.7                 | 11a                                             |                                               |
| <b>11</b>                    | 7.96 (d, $J = 8.5$ Hz, 1H)              | 116.0                 | 7c, 9                                           | 2'-CH <sub>3</sub>                            |
| <b>11a</b>                   | -                                       | 140.5                 |                                                 |                                               |
| <b>12b</b>                   | -                                       | 127.7                 |                                                 |                                               |
| <b>12a</b>                   | -                                       | 131.3                 |                                                 |                                               |
| <b>13a</b>                   | -                                       | 137.2                 |                                                 |                                               |
| <b>2'</b>                    | -                                       | 91.6                  |                                                 |                                               |
| <b>3'</b>                    | 3.89 (dd, $J = 3.8, 1.2$ Hz, 1H)        | 84.6                  | 5', 3'-OCH <sub>3</sub>                         | 2'-CH <sub>3</sub> , 5' $\alpha$ , 5' $\beta$ |
| <b>4'</b>                    | 3.37(q, $J = 3.8$ Hz, 1H)               | 50.7                  |                                                 | 4'-NCH <sub>3</sub>                           |
| <b>5'<math>\alpha</math></b> | 2.44 (ddd, $J = 14.9, 5.8, 3.8$ Hz, 1H) | 30.6                  |                                                 |                                               |
| <b>5'<math>\beta</math></b>  | 2.74 (ddd, $J = 14.8, 4.2, 1.5$ Hz, 1H) | 30.6                  |                                                 |                                               |
| <b>6'</b>                    | 6.56 (dd, $J = 5.6, 1.2$ Hz, 1H)        | 80.7                  | 2', 4', 12b                                     | 1                                             |
| <b>2'-CH<sub>3</sub></b>     | 2.35 (s, 3H)                            | 30.5                  | 2', 3'                                          |                                               |
| <b>3'-OCH<sub>3</sub></b>    | 3.44 (s, 3H)                            | 57.6                  | 3'                                              |                                               |
| <b>4'-NCH<sub>3</sub></b>    | 1.50 (s, 3H)                            | 33.7                  |                                                 |                                               |

<sup>†</sup> 5.32ppm for <sup>1</sup>H NMR, 54.0 ppm for <sup>13</sup>C NMR as internal reference

**Figure S2.**  $^1\text{H}$  NMR spectrum of staurosporine (**1**) in  $\text{CD}_2\text{Cl}_2$  (600 MHz, 298 K)

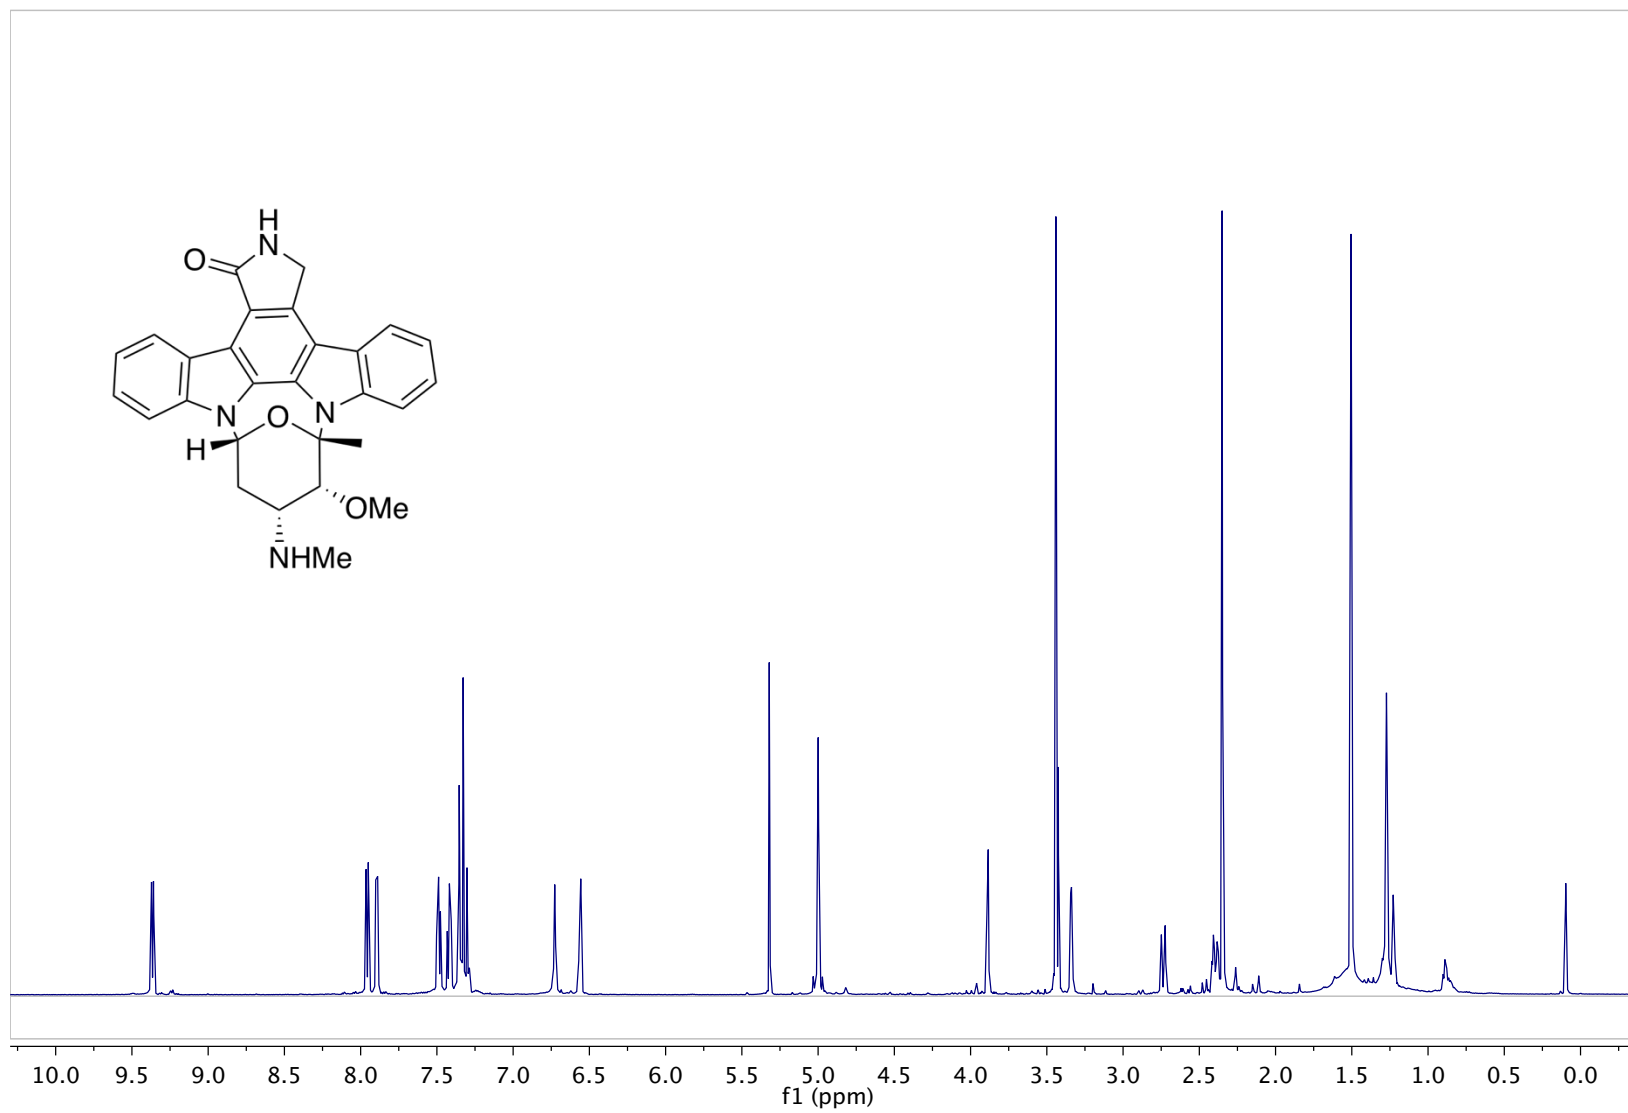

Figure S3.  $^{13}\text{C}$  NMR spectrum of staurosporine (**1**) in  $\text{CD}_2\text{Cl}_2$  (150 MHz, 298 K)

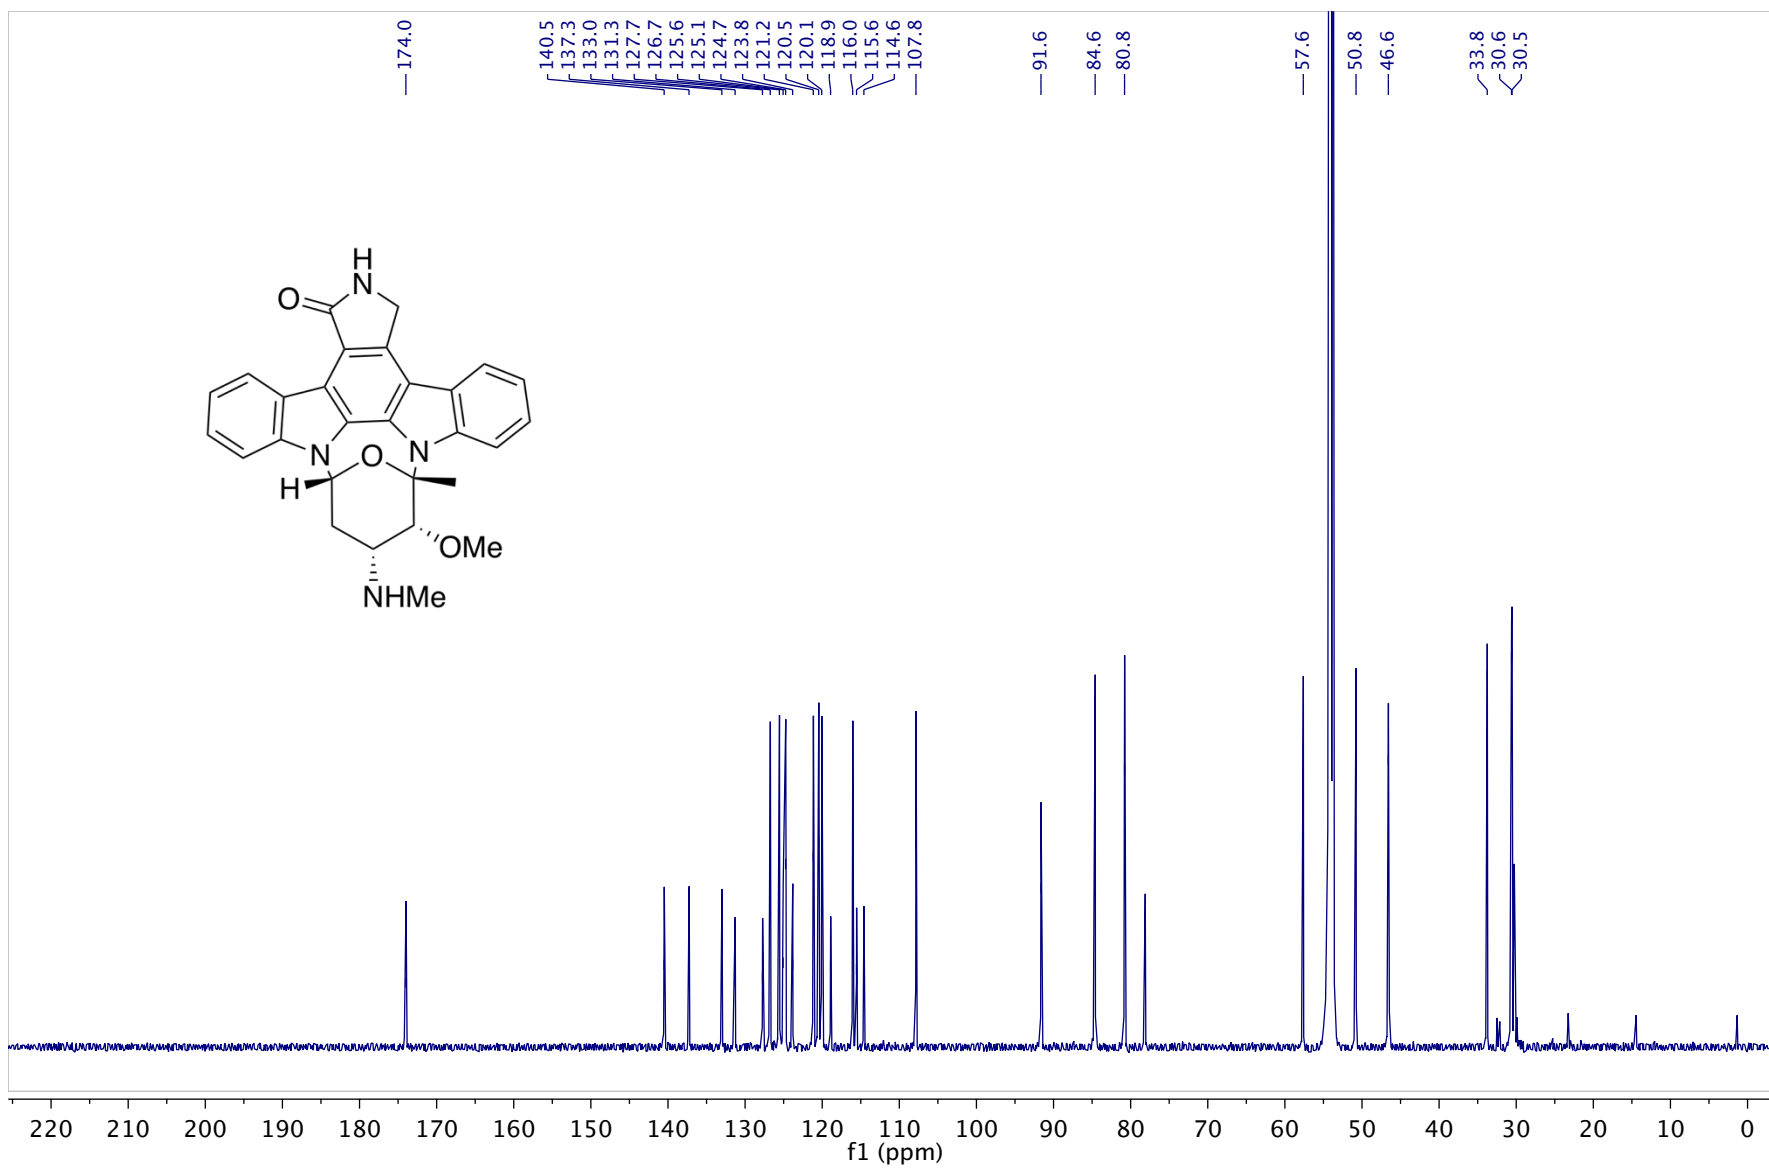

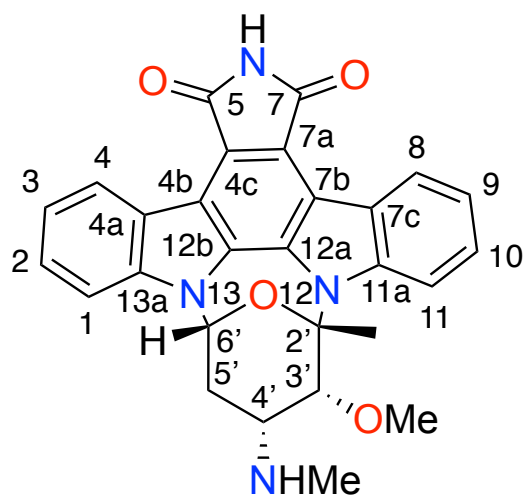

7-Oxostaurosporine (**2**)

Yellow powder,  $[\alpha]_{\text{D}}^{20} +32.0^\circ$  (c 0.1,  $\text{CHCl}_3$ )

UV ( $\text{CHCl}_3$ )  $\lambda_{\text{max}}$  (log  $\epsilon$ ) 319 (4.31) nm

IR  $\nu_{\text{max}}$  2920, 2851, 1713, 1568, 1463 and 1318  $\text{cm}^{-1}$

HRESIMS  $m/z$  481.1875  $[\text{M}+\text{H}]^+$ , calc. 481.1876 for  $\text{C}_{28}\text{H}_{25}\text{N}_4\text{O}_4$

**Figure S4.** Chemical structure, atom carbon position numbers and physical data for 7-oxostaurosporine (**2**).



**Table S2.** NMR data for 7-oxostaurosporine (**2**) in CD<sub>2</sub>Cl<sub>2</sub> (600 MHz, 298 K)

| Carbon                    | $\delta^1\text{H}$                      | $\delta^{13}\text{C}$ | HMBC                     | ROESY              |
|---------------------------|-----------------------------------------|-----------------------|--------------------------|--------------------|
| <b>1</b>                  | 7.40 (d, $J = 7.9$ Hz, 1H)              | 108.4                 | 3, 4a                    | 6'                 |
| <b>2</b>                  | 7.59 (t, $J = 6.7$ Hz, 1H)              | 127.2                 | 4, 13a                   |                    |
| <b>3</b>                  | 7.42 (t, $J = 6.9$ Hz, 1H)              | 121.2                 | 1, 4a                    |                    |
| <b>4</b>                  | 9.19 (d, $J = 7.9$ Hz, 1H)              | 126.3                 | 2, 4b, 13a               |                    |
| <b>4a</b>                 | -                                       | 122.7                 |                          |                    |
| <b>4b</b>                 | -                                       | 115.8                 |                          |                    |
| <b>4c</b>                 | -                                       | 119.8 <sup>b</sup>    |                          |                    |
| <b>5</b>                  | -                                       | 170.6 <sup>a</sup>    |                          |                    |
| <b>7</b>                  | -                                       | 170.4 <sup>a</sup>    |                          |                    |
| <b>7a</b>                 | -                                       | 122.7 <sup>b</sup>    |                          |                    |
| <b>7b</b>                 | -                                       | 117.4                 |                          |                    |
| <b>7c</b>                 | -                                       | 124.1                 |                          |                    |
| <b>8</b>                  | 9.28 (d, $J = 7.4$ Hz, 1H)              | 125.5                 | 7b, 10, 11a              |                    |
| <b>9</b>                  | 7.34 (dt, $J = 7.1, 0.8$ , 1H)          | 120.9                 | 7c, 11                   |                    |
| <b>10</b>                 | 7.48 (t, $J = 7.1$ , 1H)                | 126.5                 | 8, 11a                   |                    |
| <b>11</b>                 | 7.96 (br d, $J = 8.6$ Hz, 1H)           | 115.8                 | 7c, 9                    | 2'-CH <sub>3</sub> |
| <b>11a</b>                | -                                       | 141.6                 |                          |                    |
| <b>12a</b>                | -                                       | 132.3 <sup>b</sup>    |                          |                    |
| <b>12b</b>                | -                                       | 131.4 <sup>b</sup>    |                          |                    |
| <b>13a</b>                | -                                       | 138.6                 |                          |                    |
| <b>2'</b>                 | -                                       | 91.7                  |                          |                    |
| <b>3'</b>                 | 3.90 (d, $J = 3.7$ Hz, 1H)              | 84.6                  | 3'-OCH <sub>3</sub>      |                    |
| <b>4'</b>                 | 3.37 (q, $J = 3.6$ Hz, 1H)              | 50.6                  | 2', 4'-NHCH <sub>3</sub> |                    |
| <b>5'α</b>                | 2.41 (ddd, $J = 15.0, 5.6, 3.5$ Hz, 1H) | 30.2                  |                          |                    |
| <b>5'β</b>                | 2.77 (ddd, $J = 15.0, 3.7, 1.2$ Hz, 1H) | 30.2                  |                          |                    |
| <b>6'</b>                 | 6.55 (dd, $J = 5.6, 1.2$ Hz, 1H)        | 80.7                  | 2', 4', 12b              |                    |
| <b>2'-CH<sub>3</sub></b>  | 2.37 (s, 3H)                            | 30.7                  | 2', 3'                   |                    |
| <b>3'-OCH<sub>3</sub></b> | 3.47 (s, 3H)                            | 57.6                  | 3'                       |                    |
| <b>4'-NCH<sub>3</sub></b> | 1.50 (s, 3H)                            | 33.7                  | 4'                       |                    |

<sup>†</sup> 5.32 ppm for <sup>1</sup>H, 54.0 ppm for <sup>13</sup>C as internal reference.

<sup>a</sup> Values with the same superscript are interchangeable in the same column.

<sup>b</sup> Established by comparison from NMR data of 7-oxostaurosporine derivatives reported from Jiménez *et al* 2012 (*Mar Drugs*, 10, 1092-1102).

**Figure S5.**  $^1\text{H}$  NMR spectrum of 7-oxostaurosporine (**2**) in  $\text{CD}_2\text{Cl}_2$  (600 MHz, 298 K)

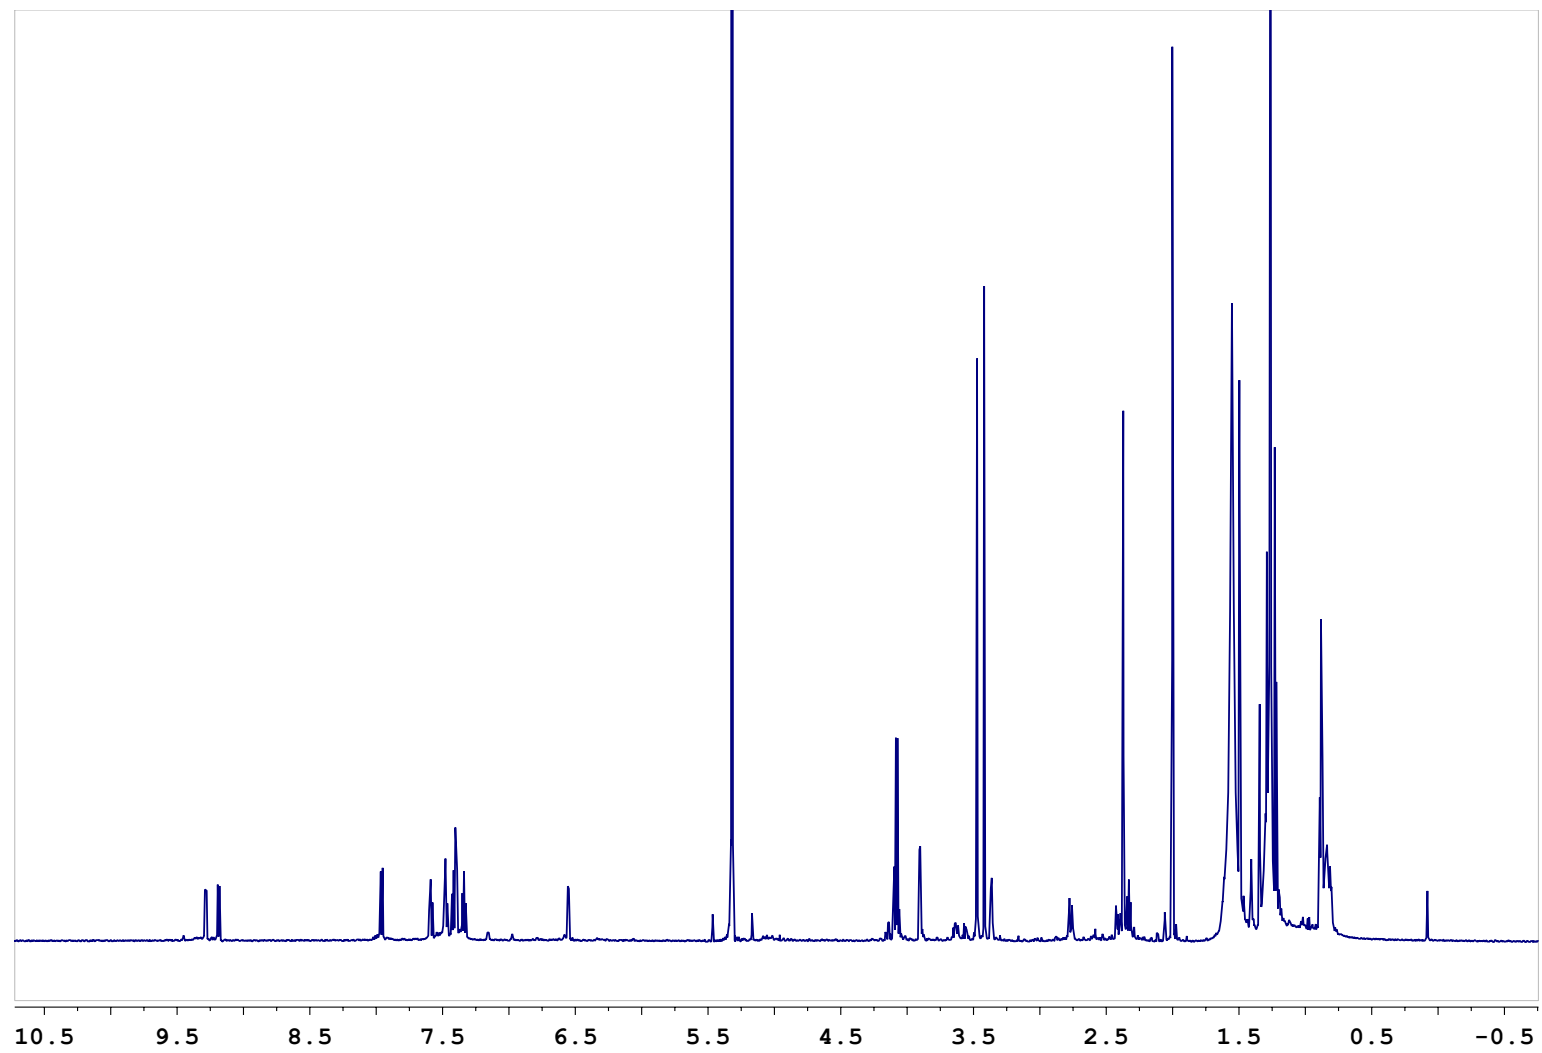

**Figure S6.**  $^{13}\text{C}$  NMR spectrum of 7-oxostaurosporine (**2**) in  $\text{CD}_2\text{Cl}_2$  (150 MHz, 298 K)

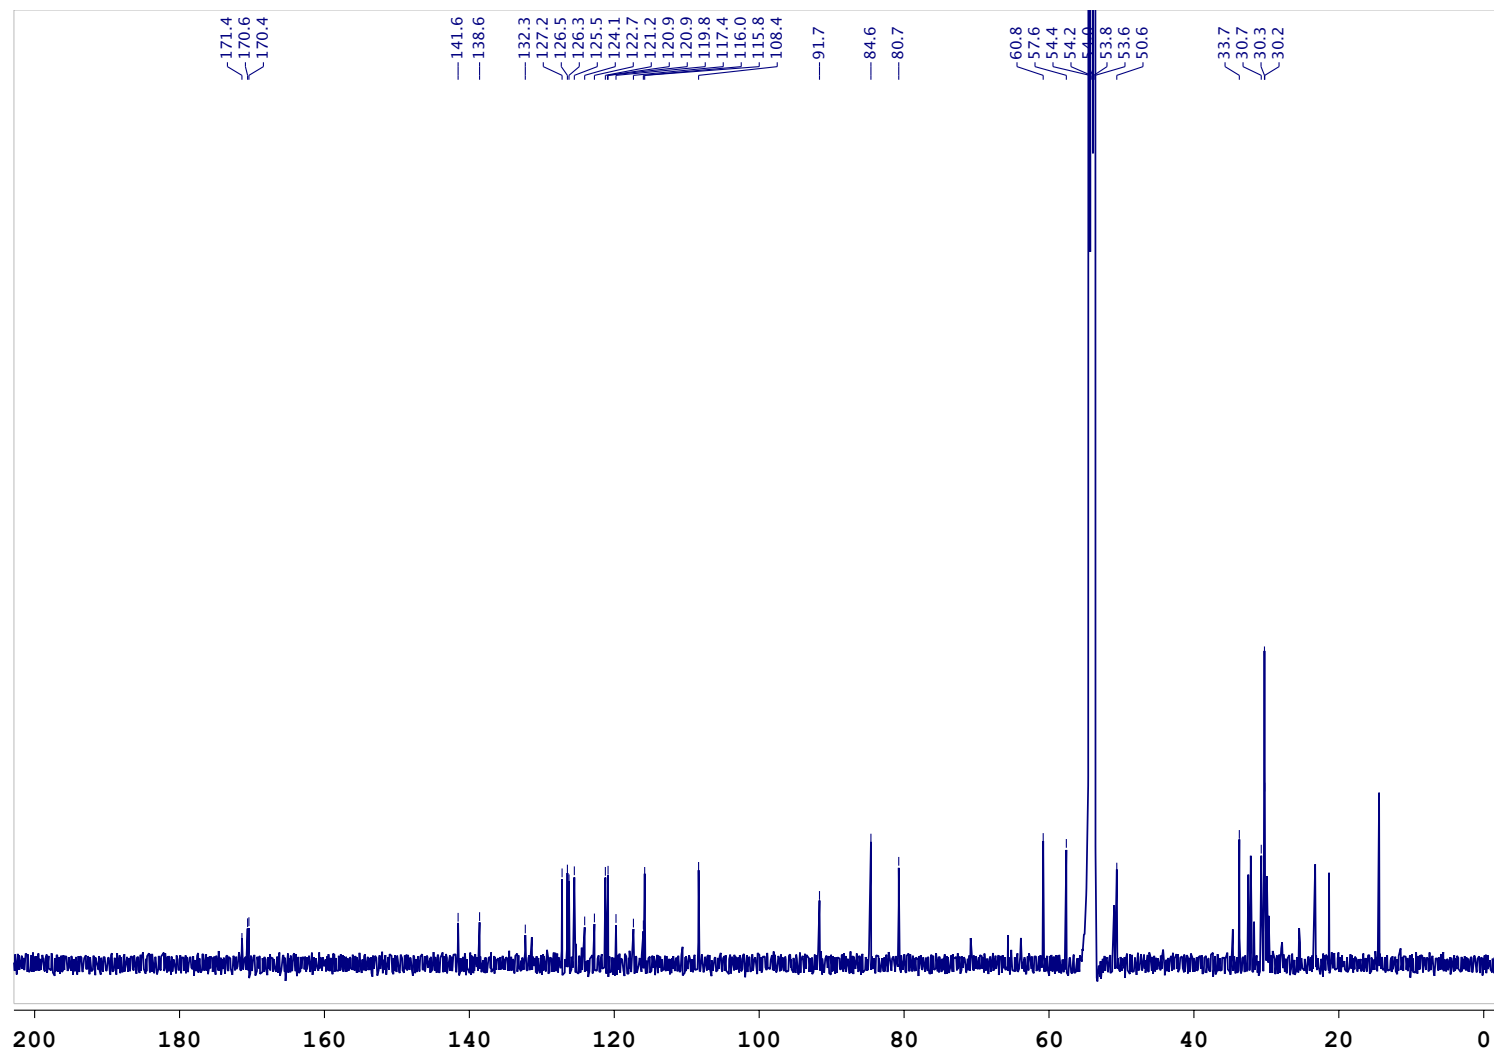

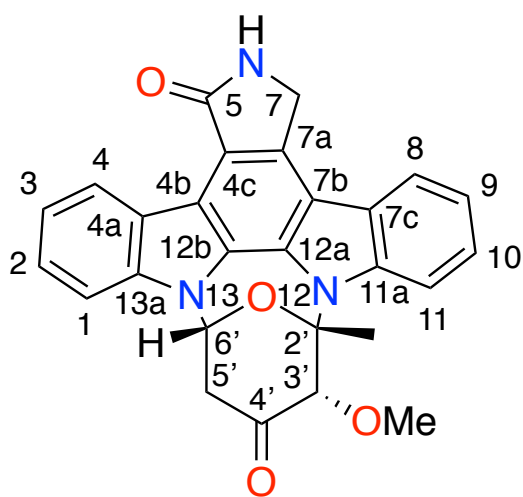

4'-Demethylamino-  
4'-oxostaurosporine (**3**)

Yellow powder,  $[\alpha]_{\text{D}}^{20}$  22° (c 0.12, CHCl<sub>3</sub>)

UV (CHCl<sub>3</sub>)  $\lambda_{\text{max}}$  (log  $\epsilon$ ) 293 (4.36) nm

IR  $\nu_{\text{max}}$  2922, 2853, 2362, 1682, 1456 and 1317 cm<sup>-1</sup>

HRESIMS m/z 474.1425 [M+Na]<sup>+</sup>, calc: 474.1430 for C<sub>27</sub>H<sub>21</sub>N<sub>3</sub>O<sub>4</sub>Na

**Figure S7.** Chemical structure, atom carbon position numbers and physical data for 4'-demethylamino-4'-oxostaurosporine (**3**).

**Table S3.** NMR data for 4'-demethylamino-4'-oxostaurosporine (**3**) in CD<sub>2</sub>Cl<sub>2</sub> (600 MHz, 298 K)

| Carbon                    | $\delta^1\text{H}$                  | $\delta^{13}\text{C}$ | HMBC                                                       | ROESY                                         |
|---------------------------|-------------------------------------|-----------------------|------------------------------------------------------------|-----------------------------------------------|
| <b>1</b>                  | 7.33 (m, 1H)                        | 108.2                 |                                                            | 6'                                            |
| <b>2</b>                  | 7.50 (t, $J=7.8$ , 1H)              | 126.4                 | 4, 13a                                                     |                                               |
| <b>3</b>                  | 7.35 (t, $J=7.8$ , 1H)              | 121.2 <sup>a</sup>    | 4a                                                         |                                               |
| <b>4</b>                  | 9.30 (d, $J=8.2$ , 1H)              | 127.1                 | 2, 13a, 4b                                                 |                                               |
| <b>4a</b>                 | -                                   | 121.2 <sup>a</sup>    |                                                            |                                               |
| <b>4b</b>                 | -                                   | 117.1                 |                                                            |                                               |
| <b>4c</b>                 | -                                   | 119.6                 |                                                            |                                               |
| <b>5</b>                  | -                                   | 173.3 <sup>‡</sup>    |                                                            |                                               |
| <b>7</b>                  | 4.94 (s, 2H)                        | 46.5                  | 5, 4c, 7a, 7b                                              |                                               |
| <b>7a</b>                 | -                                   | 133.5                 |                                                            |                                               |
| <b>7b</b>                 | -                                   | 115.8                 |                                                            |                                               |
| <b>7c</b>                 | -                                   | 125.1                 |                                                            |                                               |
| <b>8</b>                  | 7.87 (d, $J=7.8$ , 1H)              | 121.5                 | 11a                                                        |                                               |
| <b>9</b>                  | 7.35 (t, $J=7.8$ , 1H)              | 121.2 <sup>a</sup>    | 7c                                                         |                                               |
| <b>10</b>                 | 7.46 (t, $J=7.8, 1.4, 1\text{H}$ )  | 125.6                 | 8                                                          |                                               |
| <b>11</b>                 | 7.97 (d, $J=8.2$ , 1H)              | 116.3                 | 7c                                                         | 2'-CH <sub>3</sub>                            |
| <b>11a</b>                | -                                   | 140.9                 |                                                            |                                               |
| <b>12b</b>                | -                                   | 128.3 <sup>‡</sup>    |                                                            |                                               |
| <b>12a</b>                | -                                   | 124.4                 |                                                            |                                               |
| <b>13a</b>                | -                                   | 136.9                 |                                                            |                                               |
| <b>2'</b>                 | -                                   | 100.1                 |                                                            |                                               |
| <b>3'</b>                 | 4.59 (d, $J=1.0$ Hz, 1H)            | 90.0                  | 2', 4' ( $J^2$ ), 3'-OCH <sub>3</sub> , 2'-CH <sub>3</sub> | 2'-CH <sub>3</sub> , 5'a, 3'-OCH <sub>3</sub> |
| <b>4'-CO</b>              | -                                   | 199.2 <sup>‡</sup>    |                                                            |                                               |
| <b>5'a</b>                | 3.66 (ddt, $J=0.9, 6.8, 14.2$ , 1H) | 46.4                  | 3', 6', 4'CO                                               |                                               |
| <b>5'b</b>                | 2.94 (dd, $J=0.9, 14.2$ , 1H)       | 46.4                  | 4'CO                                                       |                                               |
| <b>6'</b>                 | 7.11 (dd, $J=6.8, 0.9$ , 1H)        | 85.0                  | 2', 4', 5'a, 12b                                           |                                               |
| <b>2'-CH<sub>3</sub></b>  | 2.60 (s, 3H)                        | 30.2                  | 4' ( $J^4$ ), 6', 2' ( $J^2$ )                             |                                               |
| <b>3'-OCH<sub>3</sub></b> | 3.52 (s, 3H)                        | 60.1                  |                                                            |                                               |

<sup>†</sup> 5.32ppm for <sup>1</sup>H, 54.0 ppm for <sup>13</sup>C as internal reference

<sup>a</sup> Values with the same superscript are interchangeable in the same column

<sup>‡</sup> Chemical shift assigned from HMBC experiment and by comparison with Cai Y. et al., 1996 (*J. Antibiot.* 1996, 49, 519–526)

**Figure S8.**  $^1\text{H}$  NMR spectrum of 4'-demethylamino-4'-oxostaurosporine (**3**) in  $\text{CD}_2\text{Cl}_2$  (600 MHz, 298 K)

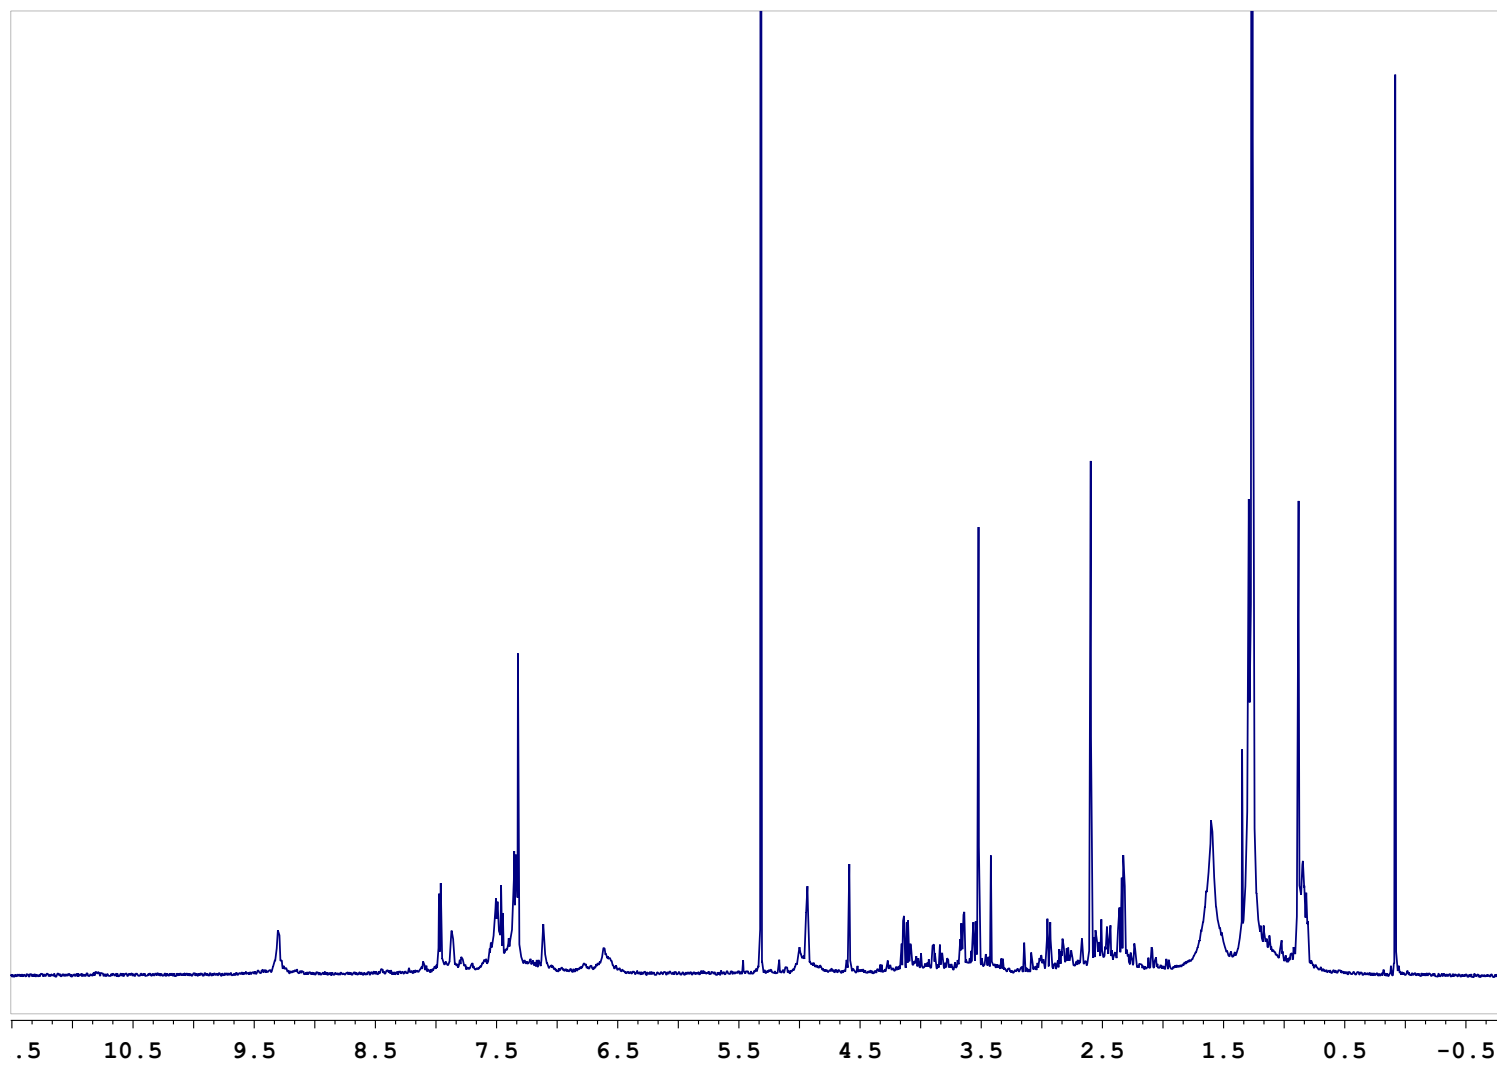

**Figure S9.**  $^{13}\text{C}$  NMR spectrum of 4'-demethylamino-4'-oxostaurosporine (**3**) in  $\text{CD}_2\text{Cl}_2$  (150 MHz, 298 K)

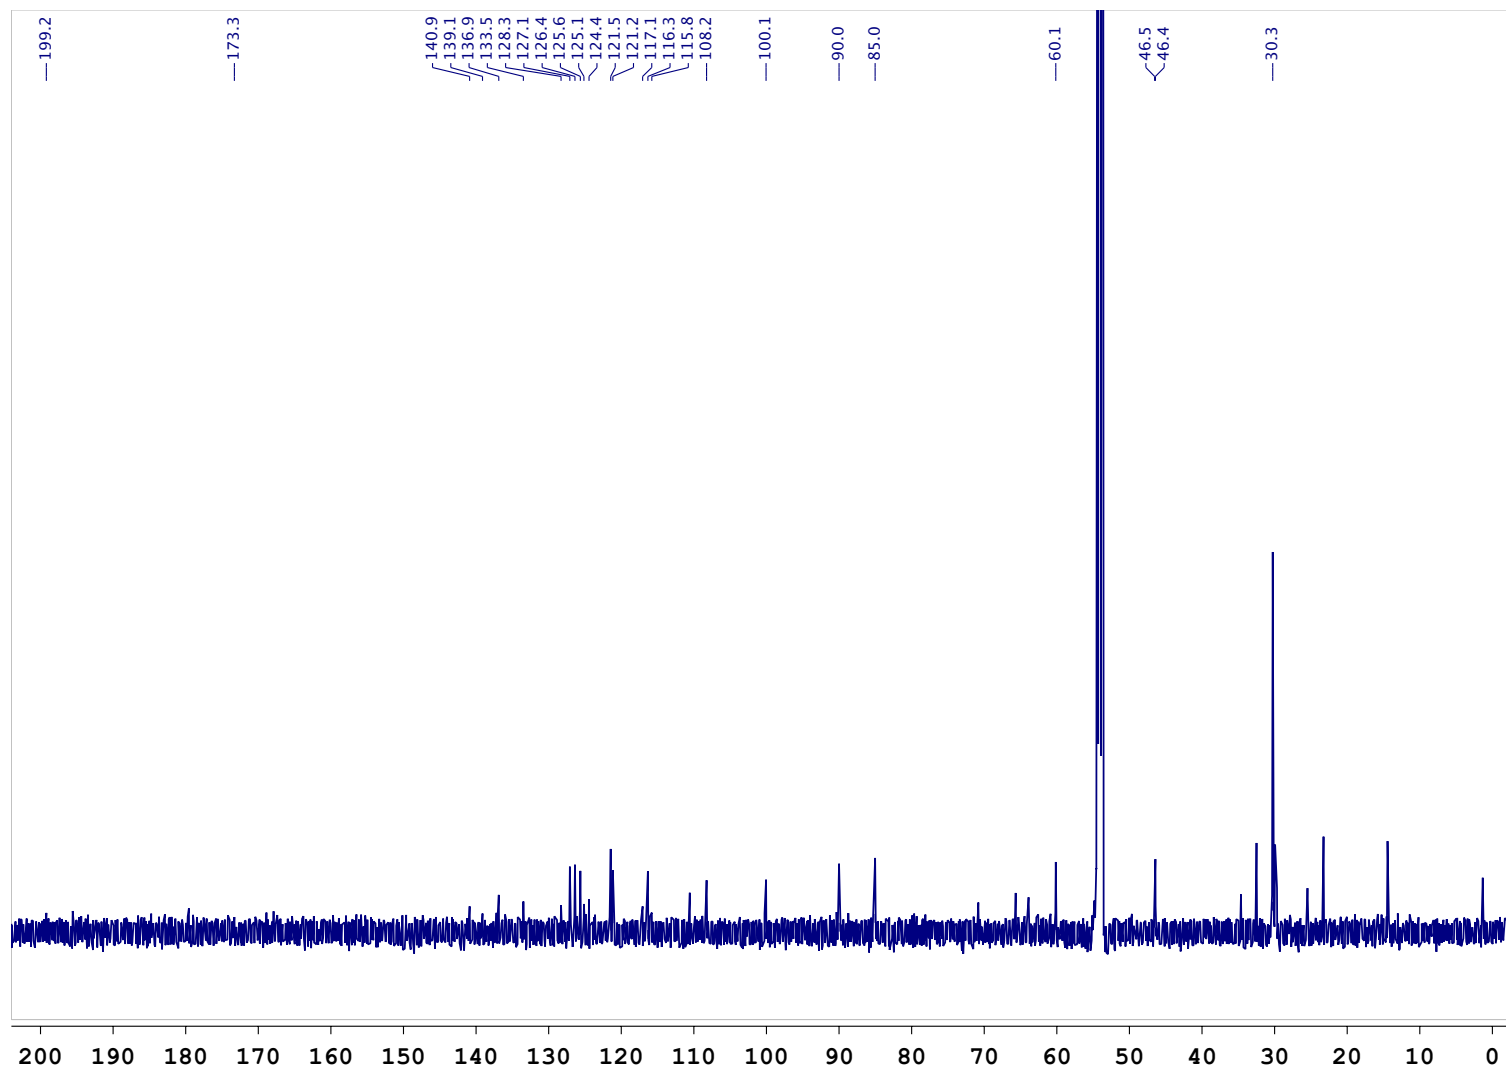





**Table S4.** NMR data for streptocarbazole B (SCZ B, **4**) in CD<sub>2</sub>Cl<sub>2</sub> (600 MHz, 298 K)

| Carbon                    | $\delta^1\text{H}$                | $\delta^{13}\text{C}$ | HMBC        | ROESY               |
|---------------------------|-----------------------------------|-----------------------|-------------|---------------------|
| <b>1</b>                  | 7.71 (d, $J = 8.2$ Hz, 1H)        | 109.5                 | 4a          | 1'                  |
| <b>2</b>                  | 7.57 (t, $J = 7.6$ Hz, 1H)        | 126.5                 | 13a         |                     |
| <b>3</b>                  | 7.40 (t, $J = 7.4$ Hz, 1H)        | 121.6                 | 1           |                     |
| <b>4</b>                  | 9.41 (d, $J = 7.9$ Hz, 1H)        | 126.6                 | 2, 13a      |                     |
| <b>4a</b>                 | -                                 | 124.05                |             |                     |
| <b>4b</b>                 | -                                 | 117.8                 |             |                     |
| <b>4c</b>                 | -                                 | 119.5                 |             |                     |
| <b>5</b>                  | -                                 | 173.1                 |             |                     |
| <b>6</b>                  | 6.23 (NH)                         | -                     | 4c, 7, 7a   |                     |
| <b>7</b>                  | 5.03 (dd, $J = 2.2, 1.1$ Hz, 2H)  | 46.2                  | 4c, 7a      |                     |
| <b>7a</b>                 | -                                 | 134.1                 |             |                     |
| <b>7b</b>                 | -                                 | 116.8                 |             |                     |
| <b>7c</b>                 | -                                 | 124.09                |             |                     |
| <b>8</b>                  | 7.94 (d, $J = 8.0$ Hz, 1H)        | 121.2                 | 7b, 10, 11a | 7, 9                |
| <b>9</b>                  | 7.36 ( $J = 7.5$ Hz, 1H)          | 121.3                 | 11          |                     |
| <b>10</b>                 | 7.53 (t, $J = 7.8$ Hz, 1H)        | 126.5                 | 8, 11a      | 11                  |
| <b>11</b>                 | 8.30 (d, $J = 8.4$ Hz, 1H)        | 115.8                 | 7c, 9       | 3'-OCH <sub>3</sub> |
| <b>11a</b>                | -                                 | 141.5                 |             |                     |
| <b>12a</b>                | -                                 | 133.6                 |             |                     |
| <b>12b</b>                | -                                 | 126.1                 |             |                     |
| <b>13a</b>                | -                                 | 140.1                 |             |                     |
| <b>1'</b>                 | 6.75 (dd, $J = 5.8, 1.6$ Hz, 1H)  | 78.2                  | 3', 5', 12b | 1                   |
| <b>2'A</b>                | 3.43 (dd, $J = 14.8, 5.6$ Hz, 2H) | 38.8                  | 1', 3', 4'  |                     |
| <b>2'B</b>                | 3.37 (dd, $J = 14.8, 1.6$ Hz, 1H) | 38.8                  | 3', 4'      |                     |
| <b>3'</b>                 | -                                 | 88.0                  |             |                     |
| <b>4'</b>                 | -                                 | 133.7                 |             |                     |
| <b>5'</b>                 | -                                 | 144.1                 |             |                     |
| <b>6'-CH<sub>3</sub></b>  | 1.68 (s, 3H)                      | 14.8                  | 4', 5'      |                     |
| <b>3'-OCH<sub>3</sub></b> | 3.62 (s, 3H)                      | 51.7                  |             | 11                  |
| <b>4'-OCH<sub>3</sub></b> | 3.11 (s, 3H)                      | 62.3                  | 4'          | 6'-CH <sub>3</sub>  |

<sup>†</sup> 5.32 ppm for <sup>1</sup>H, 54.0 ppm for <sup>13</sup>C as internal reference

**Figure S11.**  $^1\text{H}$  NMR spectrum of streptocarbazole B (SCZ B, **4**) in  $\text{CD}_2\text{Cl}_2$  (600 MHz, 298 K)

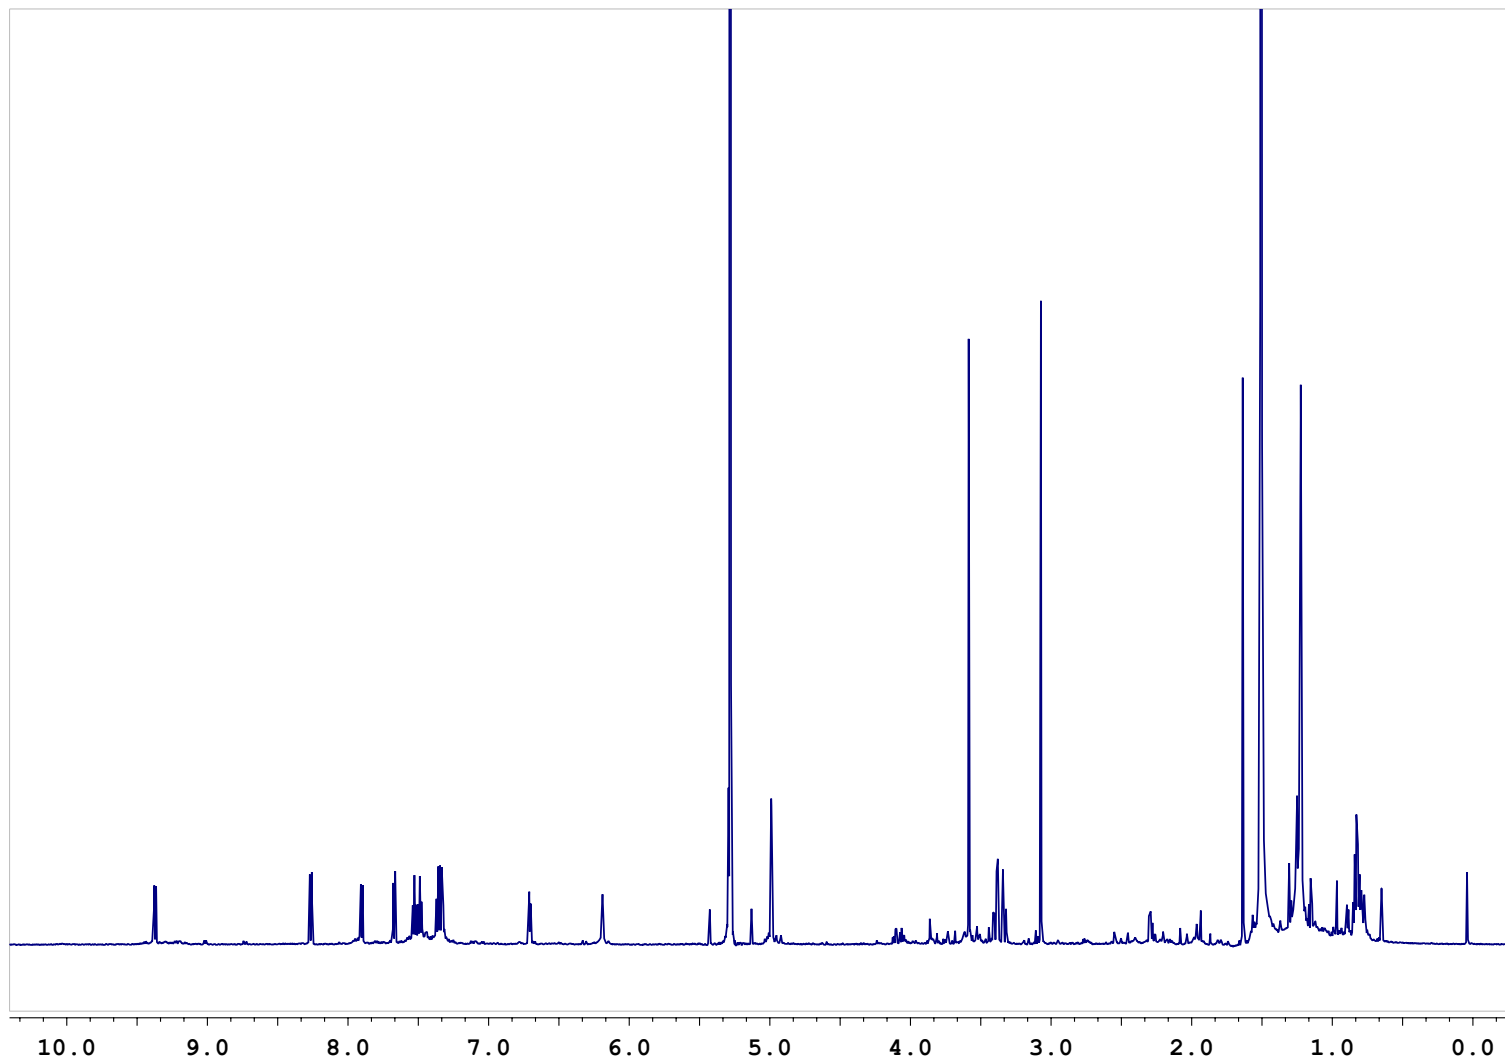

**Figure S12.**  $^{13}\text{C}$  NMR spectrum of streptocarbazole B (SCZ B, **4**) in  $\text{CD}_2\text{Cl}_2$  (150 MHz, 298 K)

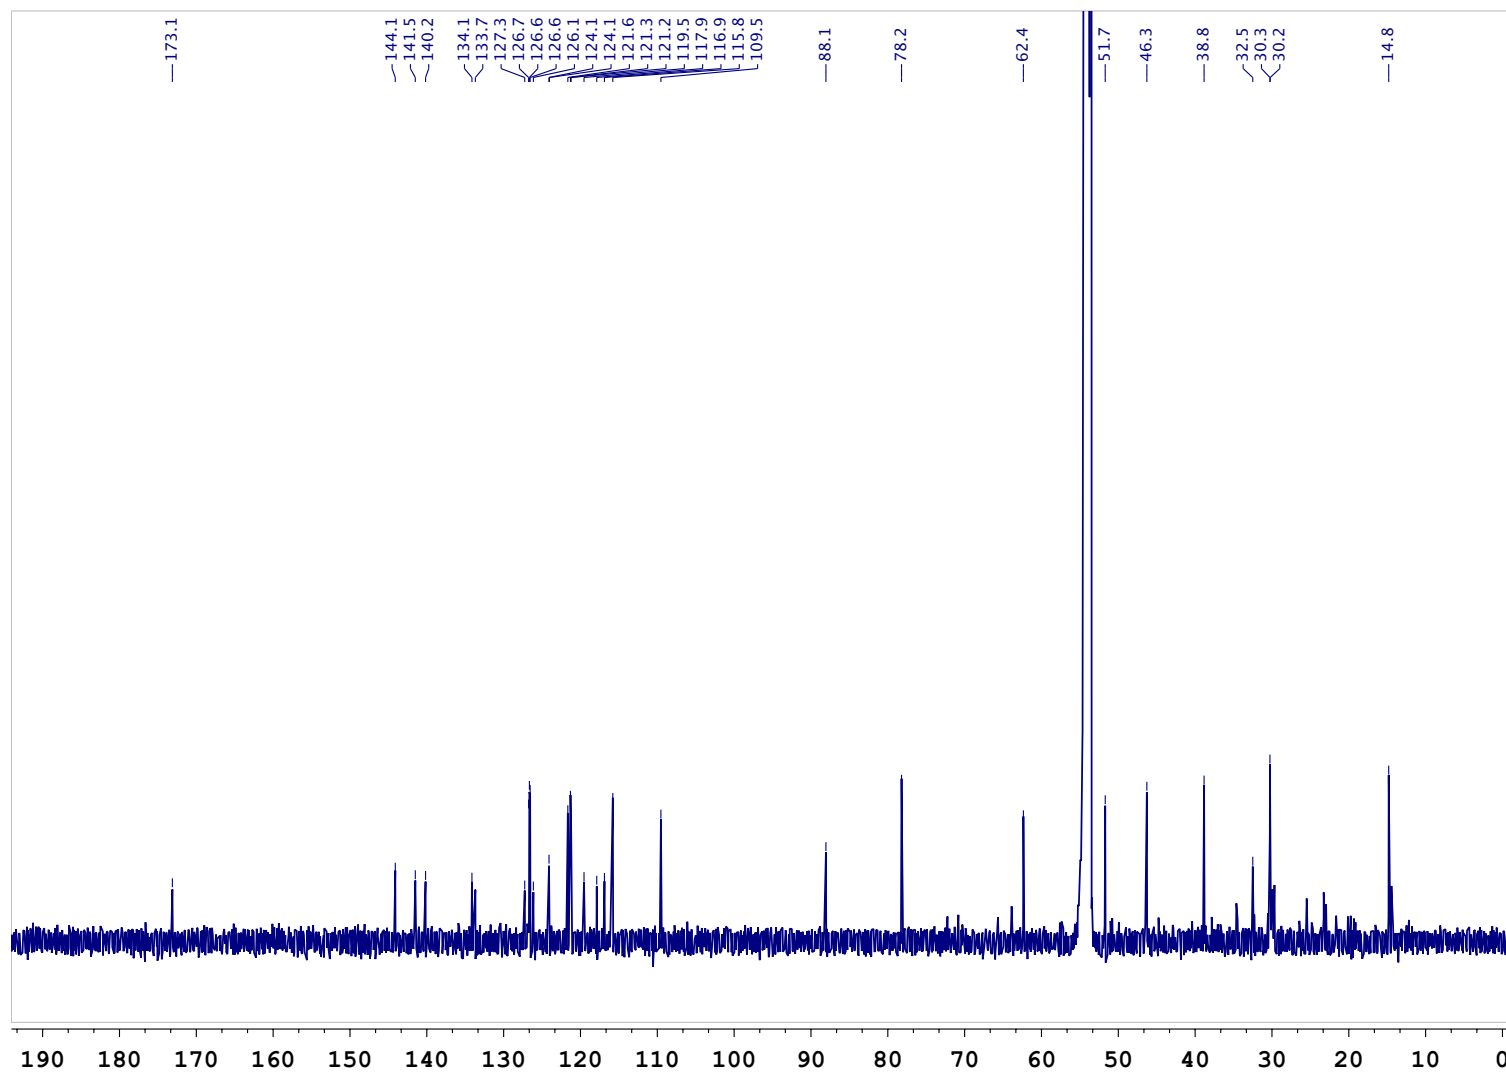

Supplement: marinedrugs-17-00588-s001.pdf [file marinedrugs-17-00588-s001.pdf]
